# Supplementary material for: Foetal tobacco and cannabis exposure, body fat and cardio‐metabolic health in childhood
Source: PubMed Central journal article supplement — Pediatr Obes. 2021 Oct 21;17(3):e12863. doi: 10.1111/ijpo.12863 (PMC9285056; doi:10.1111/ijpo.12863), 2021-10-21
Supplement: IJPO-17-0-s001.pdf [file IJPO-17-0-s001.pdf]

## Supplementary information

# Fetal tobacco and cannabis exposure, body fat and cardio-metabolic health in childhood

Kim N. Cajachagua-Torres<sup>1,2</sup>, MD, Hanan El Marroun<sup>2,3,4</sup>, PhD, Irwin K.M. Reiss<sup>2</sup>, MD PhD,

Susana Santos<sup>1,2</sup>, PhD, Vincent W.V. Jaddoe<sup>1,2</sup>, MD PhD

<sup>1</sup> The Generation R Study Group, Erasmus MC, University Medical Center Rotterdam, Rotterdam, The Netherlands

<sup>2</sup> The Department of Pediatrics, Erasmus MC, University Medical Center Rotterdam, Rotterdam, The Netherlands

<sup>3</sup> The Department of Child and Adolescent Psychiatry, Erasmus MC, University Medical Center Rotterdam, Rotterdam, The Netherlands.

<sup>4</sup> The Department of Psychology, Education and Child Studies, Erasmus School of Social and Behavioral Sciences, Erasmus University Rotterdam, Rotterdam, The Netherlands.

**Correspondence to:** Vincent W.V. Jaddoe, The Generation R Study Group (Na 29-08), Erasmus MC, University Medical Center Rotterdam, P.O. Box 2040, 3000 CA Rotterdam, the Netherlands; phone: +31 (0)10 704 3405; e-mail: [v.jaddoe@erasmusmc.nl](mailto:v.jaddoe@erasmusmc.nl)

## CONTENTS

**Table S1.** Descriptive statistics according to tobacco use

**Table S2.** Descriptive statistics according to cannabis and tobacco use

**Table S3.** Non-response analysis

**Figure S1.** Directed acyclic graphic of the study

**Table S4.** Associations of maternal and paternal tobacco and cannabis use during pregnancy with childhood body fat outcomes at age 10 years stratified for child sex

**Table S5.** Associations of maternal and paternal tobacco and cannabis use during pregnancy with childhood blood pressure and metabolic outcomes at age 10 years stratified for child sex

**Table S6.** Associations of maternal and paternal tobacco and cannabis use during pregnancy with childhood cardio-metabolic risk factors at age 10 years stratified for child sex

**Table S7.** Associations of maternal and paternal tobacco and cannabis use with childhood body fat outcomes only for children at age 10 years of Dutch mothers

**Table S8.** Associations of maternal and paternal tobacco and cannabis use with childhood cardio-metabolic risk factors only for children at age 10 years of Dutch mothers

**Methods S1.** Calculation of the continuous composite cardio-metabolic risk z-score

**Table S9.** Associations of maternal and paternal tobacco and cannabis use with childhood continuous composite cardio-metabolic z-score at age 10 years

**Table S1.** Descriptive statistics according to tobacco use

|                                                           | No<br>n =3334    | First trimester<br>only<br>n = 357 | Continued smoking<br>in pregnancy<br>n = 570 |
|-----------------------------------------------------------|------------------|------------------------------------|----------------------------------------------|
| <b>Maternal characteristic</b>                            |                  |                                    |                                              |
| Age, years, mean (SD)                                     | 31.1 (4.7)       | 30.9 (4.6)                         | 29.9 (5.6)**                                 |
| Ethnicity                                                 |                  |                                    |                                              |
| Dutch (%)                                                 | 57.6             | 61.3*                              | 51.2**                                       |
| Non-Dutch Non-Western (%)                                 | 30.4             | 24.1                               | 38.1                                         |
| Non-Dutch Western (%)                                     | 12.0             | 14.6                               | 10.7                                         |
| Educational level                                         |                  |                                    |                                              |
| None/Primary (%)                                          | 7.1              | 3.6*                               | 13.5**                                       |
| Secondary (%)                                             | 38.9             | 44.8                               | 59.8                                         |
| Higher (%)                                                | 54.0             | 51.5                               | 26.7                                         |
| Pre-pregnancy BMI, kg/m <sup>2</sup> , median (95% range) | 22.7 (18.2-34.7) | 22.2 (18.0-31.3)                   | 22.9 (18.0-35.9)                             |
| Psychopathology score, median (95% range)                 | 0.14 (0-1.15)    | 0.17 (0-1.67)*                     | 0.25 (0-1.32)**                              |
| Maternal alcohol use                                      |                  |                                    |                                              |
| Never drank in pregnancy (%)                              | 46.6             | 21.3**                             | 42.8                                         |
| Drank until pregnancy was known (%)                       | 12.8             | 25.5                               | 13.2                                         |
| Continued drinking (%)                                    | 40.6             | 53.2                               | 44.0                                         |
| <b>Paternal characteristics</b>                           |                  |                                    |                                              |
| Age, years, mean (SD)                                     | 33.8 (5.7)       | 30.8 (6.3)**                       | 31.8 (5.8)**                                 |
| Ethnicity                                                 |                  |                                    |                                              |
| Dutch (%)                                                 | 59.8             | 66.7**                             | 48.6**                                       |
| Non-Dutch Non-Western (%)                                 | 30.9             | 20.7                               | 40.0                                         |
| Non-Dutch Western (%)                                     | 9.3              | 12.6                               | 11.4                                         |
| Cannabis use, yes (%)                                     | 4.5              | 10.7**                             | 14.4**                                       |
| Tobacco use, yes (%)                                      | 34.3             | 63.2**                             | 72.8**                                       |
| Alcohol use, yes (%)                                      | 77.6             | 89.6**                             | 76.0                                         |
| BMI, kg/m <sup>2</sup> , mean (SD)                        | 25.1 (19.7-32.7) | 24.7 (19.9-32.4)*                  | 25.5 (19.5-33.2)*                            |
| <b>Child characteristics</b>                              |                  |                                    |                                              |
| Female sex, yes (%)                                       | 51.2             | 54.3                               | 48.2                                         |
| Age, years, median (95% range)                            | 9.7 (9.4-10.6)   | 9.7 (9.4-10.6)                     | 9.7 (9.4-11.0)*                              |
| BMI, kg/m <sup>2</sup> , median (95% range)               | 16.9 (14-24.6)   | 16.7 (14.1-23.5)                   | 17.5 (14.2-26.7)**                           |
| Body composition                                          |                  |                                    |                                              |
| Total fat mass, kg, median (95% range)                    | 8.4 (4.5-21.6)   | 8.3 (4.4-20)                       | 9.3 (4.8-24.9)**                             |
| Android/gynoid ratio, median (95% range)                  | 0.24 (0.15-0.48) | 0.24 (0.15-0.48)                   | 0.27 (0.16-0.52)**                           |
| Fat-free mass, kg, median (95% range)                     | 25.3 (19.0-33.6) | 25.4 (19.6-34.0)                   | 25.2 (19.2-35.6)                             |
| Blood pressure, mmHg                                      |                  |                                    |                                              |
| Systolic, mean (SD)                                       | 103.0 (8.0)      | 102.4 (7.3)                        | 104.3 (8.4)**                                |
| Diastolic, mean (SD)                                      | 58.5 (6.4)       | 58.2 (6.2)                         | 59.3 (6.8)**                                 |
| Lipid concentrations                                      |                  |                                    |                                              |
| Total-cholesterol, mmol/L, mean (SD)                      | 4.3 (0.7)        | 4.3 (0.7)                          | 4.3 (0.6)                                    |
| HDL-cholesterol, mmol/L, mean (SD)                        | 1.48 (0.34)      | 1.50 (0.34)                        | 1.44 (0.35)                                  |
| Triglycerides, mmol/L, median (95% range)                 | 0.98 (0.42-2.49) | 1.01 (0.43-2.94)                   | 1.03 (0.45-3.04)**                           |
| Insulin, pmol/L, median (95% range)                       | 174.0 (35-623.7) | 163.5 (38.8-541.4)                 | 179.6 (39.2-744.3)                           |
| Glucose, mmol/L, mean (SD)                                | 5.2 (0.9)        | 5.2 (0.9)                          | 5.2 (0.9)                                    |
| Overweight, yes (%)                                       | 17.5             | 16.9                               | 26.0**                                       |
| Cardio-metabolic clustering risk, yes (%)                 | 9.1              | 7.6                                | 13.0**                                       |

Note: Groups are categorized on maternal only tobacco use during pregnancy, maternal cannabis users were excluded. Values are presented as means (SD), medians (95% range), or percentages. There were no missing data on these variables as they were imputed using multiple imputation methods, to except parental cannabis and tobacco use, and childhood cardio-metabolic profile. p-values are resultant from t-Test or Man Whitney-U test for continuous variables and chi-squared for categorical variables between each group with non-exposure group (reference). p-value < 0.05 (\*), p-value < 0.01 (\*\*).

Abbreviations: SD: standard deviation, BMI: body mass index, HDL-cholesterol: high-density lipoprotein cholesterol.

**Table S2.** Descriptive statistics according to cannabis and tobacco use

|                                                           | No<br>n =3982      | Maternal<br>cannabis use<br>during pregnancy<br>n = 118 | Maternal<br>cannabis use<br>before pregnancy<br>n = 122 | Maternal<br>continued tobacco<br>use in pregnancy<br>n = 570 |
|-----------------------------------------------------------|--------------------|---------------------------------------------------------|---------------------------------------------------------|--------------------------------------------------------------|
| <b>Maternal characteristic</b>                            |                    |                                                         |                                                         |                                                              |
| Age, years, mean (SD)                                     | 31.0 (4.7)         | 27.8 (5.9)**                                            | 29.5 (5.7)**                                            | 29.9 (5.6)**                                                 |
| Ethnicity                                                 |                    |                                                         |                                                         |                                                              |
| Dutch (%)                                                 | 57.5               | 58.5                                                    | 64.8*                                                   | 51.2**                                                       |
| Non-Dutch Non-Western (%)                                 | 30.4               | 32.2                                                    | 19.7                                                    | 38.1                                                         |
| Non-Dutch Western (%)                                     | 12.1               | 9.3                                                     | 15.6                                                    | 10.7                                                         |
| Educational level                                         |                    |                                                         |                                                         |                                                              |
| None/Primary (%)                                          | 7.1                | 11.0**                                                  | 8.2*                                                    | 13.5**                                                       |
| Secondary (%)                                             | 39.6               | 64.4                                                    | 51.6                                                    | 59.8                                                         |
| Higher (%)                                                | 53.3               | 24.6                                                    | 40.2                                                    | 26.7                                                         |
| Pre-pregnancy BMI, kg/m <sup>2</sup> , median (95% range) | 22.6 (18.1-34.6)   | 21.7 (16.9-36.2)**                                      | 22.0 (18.1-35.1)**                                      | 22.9 (18.0-35.9)                                             |
| Psychopathology score, median (95% range)                 | 0.14 (0-1.18)      | 0.27 (0-1.68)**                                         | 0.22 (0-0.96)**                                         | 0.25 (0-1.67)**                                              |
| Maternal alcohol use                                      |                    |                                                         |                                                         |                                                              |
| Never drank in pregnancy (%)                              | 44.3               | 30.5*                                                   | 32.0**                                                  | 42.8                                                         |
| Until pregnancy was known (%)                             | 14.0               | 17.8                                                    | 9.8                                                     | 13.2                                                         |
| Continued drinking (%)                                    | 41.7               | 51.7                                                    | 58.2                                                    | 44.0                                                         |
| Maternal tobacco use                                      |                    |                                                         |                                                         |                                                              |
| Never smoked in pregnancy (%)                             | 90.3               | 12.8**                                                  | 53.7**                                                  | -                                                            |
| Until pregnancy was known (%)                             | 9.7                | 15.4                                                    | 18.2                                                    | -                                                            |
| Continued smoking (%)                                     | -                  | 71.8                                                    | 28.1                                                    | 100                                                          |
| <b>Paternal characteristics</b>                           |                    |                                                         |                                                         |                                                              |
| Age, years, mean (SD)                                     | 33.8 (5.7)         | 30.8 (6.3)**                                            | 31.8 (5.8)**                                            | 32.1 (6.3)**                                                 |
| Ethnicity                                                 |                    |                                                         |                                                         |                                                              |
| Dutch (%)                                                 | 59.9               | 44.9**                                                  | 54.9                                                    | 48.6**                                                       |
| Non-Dutch Non-Western (%)                                 | 30.5               | 44.1                                                    | 30.3                                                    | 40.0                                                         |
| Non-Dutch Western (%)                                     | 9.6                | 11.0                                                    | 14.8                                                    | 11.4                                                         |
| Cannabis use, yes (%)                                     | 5.1                | 81.1**                                                  | 64.0**                                                  | 14.4**                                                       |
| Tobacco use, yes (%)                                      | 36.9               | 82.5**                                                  | 63.9**                                                  | 72.8**                                                       |
| Alcohol use, yes (%)                                      | 78.8               | 90.7**                                                  | 91.8**                                                  | 76.0                                                         |
| BMI, kg/m <sup>2</sup> , mean (SD)                        | 25.1 (19.7-32.7)   | 24 (18.6-33.8)**                                        | 24 (19.4-31.6)**                                        | 25.5 (19.5-33.2)*                                            |
| <b>Child characteristics</b>                              |                    |                                                         |                                                         |                                                              |
| Female sex, yes (%)                                       | 51.1               | 42.4                                                    | 49.2                                                    | 48.2                                                         |
| Age, years, median (95% range)                            | 9.7 (9.3-10.7)     | 9.8 (9.4-11.5)                                          | 9.7 (9.4-10.4)                                          | 9.7 (9.4-11)                                                 |
| BMI, kg/m <sup>2</sup> , median (95% range)               | 16.9 (14-24.5)     | 17.6 (14.3-24.1)**                                      | 17.0 (14.1-24.7)                                        | 17.5 (14.2-26.7)**                                           |
| Body composition                                          |                    |                                                         |                                                         |                                                              |
| Total fat mass, kg, median (range)                        | 8.5 (4.5-21.6)     | 9.1 (5-22.5)                                            | 8.3 (4.6-20.1)                                          | 9.3 (4.8-24.9)**                                             |
| Android/gynoid ratio, median (range)                      | 0.24 (0.15-0.48)   | 0.26 (0.17-0.51)*                                       | 0.24 (0.15-0.46)                                        | 0.27 (0.16-0.52)**                                           |
| Fat free-mass, kg, median (range)                         | 25.3 (19-33.6)     | 26.2 (20.7-33.9)*                                       | 24.9 (20.1-34.1)                                        | 25.2 (19.2-35.6)                                             |
| Blood pressure, mmHg                                      |                    |                                                         |                                                         |                                                              |
| Systolic, mean (SD)                                       | 103 (7.9)          | 104.5 (8.0)*                                            | 102.7 (7.5)                                             | 104.3 (8.4)**                                                |
| Diastolic, mean (SD)                                      | 58.5 (6.4)         | 58.8 (6.9)                                              | 58.7 (6.5)                                              | 59.3 (6.8)**                                                 |
| Lipid concentrations, mmol/L                              |                    |                                                         |                                                         |                                                              |
| Total-cholesterol, mean (SD)                              | 4.3 (0.7)          | 4.3 (0.8)                                               | 4.2 (0.7)                                               | 4.3 (0.6)                                                    |
| HDL-cholesterol, mean (SD)                                | 1.48 (0.34)        | 1.44 (0.35)                                             | 1.52 (0.34)                                             | 1.44 (0.35)*                                                 |
| Triglycerides, median (95% range)                         | 0.97 (0.42-2.55)   | 0.97 (0.4-2.8)                                          | 0.89 (0.37-1.76)                                        | 1.03 (0.45-3.04)**                                           |
| Insulin, pmol/L, median (95% range)                       | 175.5 (34.9-618.4) | 183.8 (30.1-509.5)                                      | 180.9 (42.8-672.3)                                      | 179.6 (39.2-744.3)                                           |
| Glucose, mmol/L, mean (SD)                                | 5.2 (0.9)          | 5.2 (0.9)                                               | 5.2 (1.0)                                               | 5.2 (0.9)                                                    |
| Overweight, yes (%)                                       | 17.6               | 22.0                                                    | 18.0                                                    | 26.0**                                                       |
| Cardio-metabolic clustering, yes (%)                      | 9.0                | 12.7                                                    | 4.9                                                     | 13.0**                                                       |

Note: Groups are categorized on maternal cannabis and tobacco use during pregnancy in non-overlapping groups. Values are presented as means (SD), medians (95% range), or percentages. There were no missing data on these variables as they were imputed using multiple imputation methods, to except parental cannabis and tobacco use, and childhood cardio-metabolic profile. p-values are resultant from t-Test or Man Whitney-U test for continuous variables and chi-squared for categorical variables between each group with non-exposure group (reference). p-value < 0.05 (\*), p-value < 0.01 (\*\*).  
Abbreviations: SD: standard deviation, BMI: body mass index, HDL-cholesterol: high-density lipoprotein cholesterol.

**Table S3.** Non-response analysis

|                                                           | <b>Follow up at 10<br/>years<br/>n = 4792</b> | <b>No follow up at 10<br/>years<br/>n = 3324</b> | <b>p-value*</b> |
|-----------------------------------------------------------|-----------------------------------------------|--------------------------------------------------|-----------------|
| <b>Maternal characteristic</b>                            |                                               |                                                  |                 |
| Age, years, mean (SD)                                     | 30.8 (4.9)                                    | 28.2 (5.4)                                       | <0.01           |
| Missing (%)                                               | -                                             | 0.06                                             |                 |
| Ethnicity                                                 |                                               |                                                  | <0.01           |
| Dutch (%)                                                 | 56.7                                          | 35.0                                             |                 |
| Non-Dutch Non-Western (%)                                 | 30.5                                          | 49.0                                             |                 |
| Non-Dutch Western (%)                                     | 11.9                                          | 10.4                                             |                 |
| Missing (%)                                               | 0.9                                           | 5.6                                              |                 |
| Educational level                                         |                                               |                                                  | <0.01           |
| None/Primary (%)                                          | 7.3                                           | 15.9                                             |                 |
| Secondary (%)                                             | 41.3                                          | 48.1                                             |                 |
| Higher (%)                                                | 48.3                                          | 26.9                                             |                 |
| Missing (%)                                               | 3.2                                           | 9.1                                              |                 |
| Pre-pregnancy BMI, kg/m <sup>2</sup> , median (95% range) | 22.6 (18.1-34.5)                              | 22.7 (17.7-35.5)                                 | 0.06            |
| Missing (%)                                               | 14.0                                          | 17.9                                             |                 |
| Psychopathology score, median (95% range)                 | 0.15 (0-1.27)                                 | 0.21 (0-1.73)                                    | <0.01           |
| Missing (%)                                               | 15.9                                          | 4.0                                              |                 |
| Maternal alcohol use                                      |                                               |                                                  | <0.01           |
| Never drank (%)                                           | 39.3                                          | 52.6                                             |                 |
| Drank until pregnancy was known (%)                       | 12.7                                          | 11.0                                             |                 |
| Continued drinking (%)                                    | 39.2                                          | 24.4                                             |                 |
| Missing (%)                                               | 8.8                                           | 12.0                                             |                 |
| Maternal tobacco use                                      |                                               |                                                  | <0.01           |
| None (%)                                                  | 71.2                                          | 62.2                                             |                 |
| Smoked until pregnancy was known (%)                      | 8.3                                           | 7.5                                              |                 |
| Continued in pregnancy (%)                                | 14.4                                          | 21.6                                             |                 |
| Missing (%)                                               | 6.1                                           | 8.7                                              |                 |
| Maternal cannabis use                                     |                                               |                                                  | <0.01           |
| None (%)                                                  | 93.6                                          | 90.7                                             |                 |
| Before pregnancy (%)                                      | 2.5                                           | 3.2                                              |                 |
| During pregnancy (%)                                      | 2.5                                           | 3.9                                              |                 |
| Missing (%)                                               | 1.4                                           | 2.1                                              |                 |
| <b>Paternal characteristics</b>                           |                                               |                                                  |                 |
| Age, years, mean(SD)                                      | 33.5 (5.7)                                    | 31.7 (6.4)                                       | <0.01           |
| Missing(%)                                                | 10.2                                          | 23.6                                             |                 |
| Ethnicity                                                 |                                               |                                                  | <0.01           |
| Dutch (%)                                                 | 57.0                                          | 32.6                                             |                 |
| Non-Dutch Non-Western (%)                                 | 29.0                                          | 42.8                                             |                 |
| Non-Dutch Western (%)                                     | 9.5                                           | 7.3                                              |                 |
| Missing (%)                                               | 4.5                                           | 17.2                                             |                 |
| Paternal tobacco use                                      |                                               |                                                  | <0.01           |
| No exposure (%)                                           | 53.0                                          | 45.1                                             |                 |
| Exposure (%)                                              | 39.7                                          | 43.7                                             |                 |
| Missing (%)                                               | 7.3                                           | 11.2                                             |                 |
| Paternal cannabis use                                     |                                               |                                                  | <0.01           |
| No exposure (%)                                           | 82.0                                          | 75.6                                             |                 |
| Exposure (%)                                              | 8.7                                           | 10.8                                             |                 |
| Missing (%)                                               | 9.3                                           | 13.6                                             |                 |
| Paternal alcohol use                                      |                                               |                                                  | <0.01           |
| No exposure (%)                                           | 19.0                                          | 30.1                                             |                 |
| Exposure (%)                                              | 73.3                                          | 57.9                                             |                 |
| Missing (%)                                               | 7.7                                           | 12.1                                             |                 |
| BMI, kg/m <sup>2</sup> , median (95% range)               | 24.9 (19.6-32.8)                              | 25.1 (19.2-34.0)                                 | 0.28            |

|                                |                |                |       |
|--------------------------------|----------------|----------------|-------|
| Missing (%)                    | 20.9           | 36.5           |       |
| <b>Child characteristics</b>   |                |                |       |
| Female sex (%)                 | 50.5           | 47.9           | 0.02  |
| Missing (%)                    | -              | 0.1            |       |
| Age, years, median (95% range) | 9.7 (9.4-10.7) | 9.8 (9.5-12.6) | <0.01 |
| Missing (%)                    | -              | 96.0           |       |

Note: Values are means and standard deviation (SD), medians (90% range), or percentages.

\*Differences in subjects' characteristics between the groups were evaluated using T-test for the normally distributed continuous variables, Man Whitney-U test for the not-normally distributed continuous variables, and chi-square tests for proportions.

Abbreviations: SD: standard deviation, BMI: body mass index.

**Figure S1.** Directed acyclic graph of the study

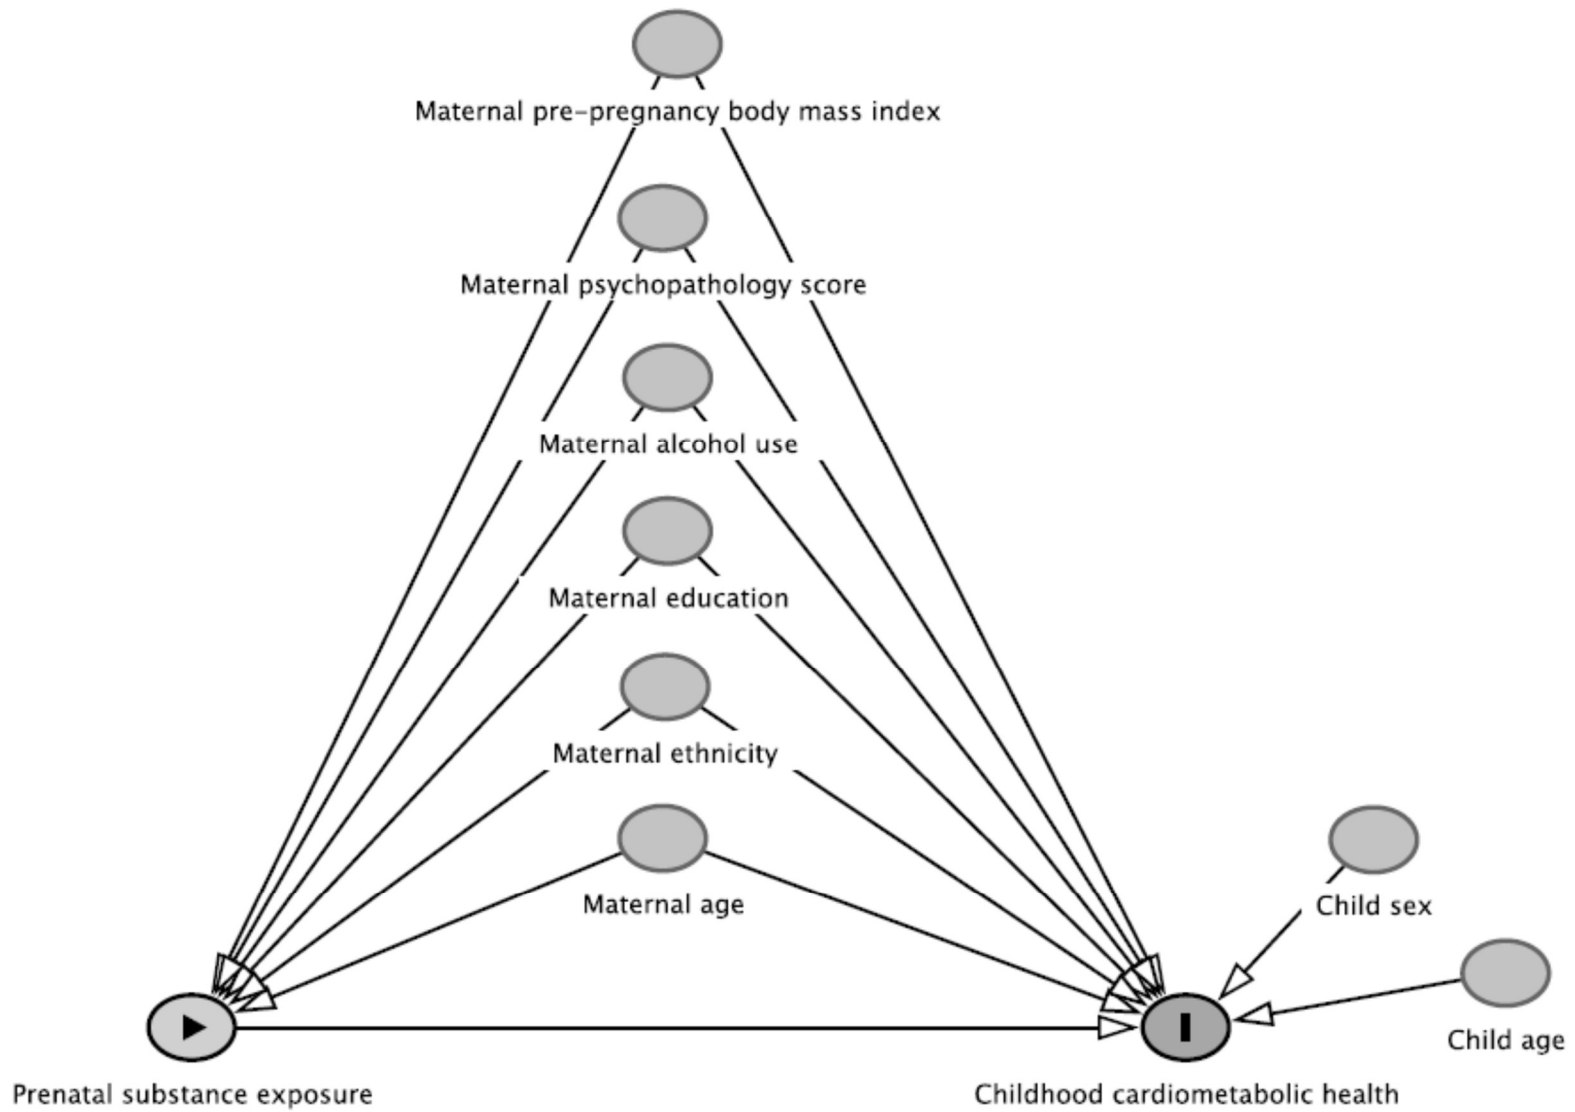



**Table S4.** Associations of maternal and paternal tobacco and cannabis use during pregnancy with childhood body fat outcomes at age 10 years stratified for child sex

|                                        | Body mass index (SDS) <sup>a</sup> |                                | Android-gynoid ratio (SDS) <sup>a</sup> |                                | Fat mass index (SDS) <sup>a</sup> |                                | Fat-free mass index (SDS) <sup>a</sup> |                                | Overweight <sup>b</sup> |                       |
|----------------------------------------|------------------------------------|--------------------------------|-----------------------------------------|--------------------------------|-----------------------------------|--------------------------------|----------------------------------------|--------------------------------|-------------------------|-----------------------|
|                                        | Boys<br>(n = 2078)                 | Girls<br>(n = 2174)            | Boys<br>(n = 2056)                      | Girls<br>(n = 2152)            | Boys<br>(n = 2049)                | Girls<br>(n = 2150)            | Boys<br>(n = 2049)                     | Girls<br>(n = 2150)            | Boys<br>(n = 2078)      | Girls<br>(n = 2174)   |
| <b>Tobacco only</b>                    | <b>Difference<br/>(95% CI)</b>     | <b>Difference<br/>(95% CI)</b> | <b>Difference<br/>(95% CI)</b>          | <b>Difference<br/>(95% CI)</b> | <b>Difference<br/>(95% CI)</b>    | <b>Difference<br/>(95% CI)</b> | <b>Difference<br/>(95% CI)</b>         | <b>Difference<br/>(95% CI)</b> | <b>OR (95% CI)</b>      | <b>OR (95% CI)</b>    |
| <b>Maternal use</b>                    |                                    |                                |                                         |                                |                                   |                                |                                        |                                |                         |                       |
| No                                     | Reference                          | Reference                      | Reference                               | Reference                      | Reference                         | Reference                      | Reference                              | Reference                      | Reference               | Reference             |
| First trimester only                   | 0.04<br>(-0.12, 0.20)              | -0.01<br>(-0.15, 0.14)         | 0.06<br>(-0.09, 0.21)                   | 0.14<br>(-0.01, 0.28)          | -0.02<br>(-0.17, 0.13)            | -0.02<br>(-0.15, 0.10)         | -0.01<br>(-0.15, 0.13)                 | 0.05<br>(-0.09, 0.19)          | 0.86<br>(0.49, 1.48)    | 1.39<br>(0.92, 2.08)  |
| Continued smoking                      | 0.11<br>(-0.02, 0.23)              | 0.23<br>(0.10, 0.35)**         | 0.15<br>(0.03, 0.26)**                  | 0.29<br>(0.16, 0.41)**         | 0.11<br>(-0.01, 0.23)             | 0.30<br>(0.19, 0.41)**         | 0.07<br>(-0.04, 0.18)                  | 0.10<br>(-0.03, 0.22)          | 1.35<br>(0.96, 1.91)    | 1.38<br>(0.99, 1.91)  |
| < 5 per day                            | -0.02<br>(-0.19, 0.15)             | 0.26<br>(0.08, 0.45)**         | 0.01<br>(-0.15, 0.17)                   | 0.27<br>(0.08, 0.46)**         | -0.05<br>(-0.21, 0.11)            | 0.30<br>(0.14, 0.46)**         | 0.01<br>(-0.14, 0.16)                  | 0.11<br>(-0.08, 0.29)          | 1.16<br>(0.73, 1.87)    | 1.14<br>(0.69, 1.87)  |
| ≥ 5 per day                            | 0.23<br>(0.06, 0.40)**             | 0.20<br>(0.05, 0.36)**         | 0.27<br>(0.12, 0.43)**                  | 0.30<br>(0.14, 0.46)**         | 0.26<br>(0.10, 0.41)**            | 0.30<br>(0.16, 0.43)**         | 0.13<br>(-0.02, 0.27)                  | 0.09<br>(-0.07, 0.24)          | 1.54<br>(1.00, 2.39)    | 1.55<br>(1.04, 2.31)* |
| p-value interaction model <sup>#</sup> |                                    | 0.22                           |                                         | 0.19                           |                                   | 0.12                           |                                        | 0.60                           |                         | 0.42                  |
| <b>Paternal use</b>                    |                                    |                                |                                         |                                |                                   |                                |                                        |                                |                         |                       |
| No                                     | Reference                          | Reference                      | Reference                               | Reference                      | Reference                         | Reference                      | Reference                              | Reference                      | Reference               | Reference             |
| Yes                                    | 0.16<br>(0.07, 0.25)**             | 0.09<br>(0.00, 0.18)*          | 0.19<br>(0.11, 0.27)**                  | 0.14<br>(0.05, 0.23)**         | 0.17<br>(0.08, 0.25)**            | 0.13<br>(0.06, 0.20)**         | 0.05<br>(-0.03, 0.13)                  | 0.01<br>(-0.08, 0.09)          | 1.38<br>(1.06, 1.80)**  | 1.24<br>(0.97, 1.57)  |
| < 5 per day                            | 0.10<br>(-0.03, 0.22)              | 0.04<br>(-0.08, 0.17)          | 0.10<br>(-0.02, 0.21)                   | 0.07<br>(-0.05, 0.20)          | 0.10<br>(-0.01, 0.21)             | 0.02<br>(-0.09, 0.12)          | 0.01<br>(-0.09, 0.12)                  | 0.04<br>(-0.09, 0.16)          | 1.29<br>(0.89, 1.88)    | 0.98<br>(0.67, 1.41)  |
| ≥ 5 per day                            | 0.21<br>(0.10, 0.31)**             | 0.12<br>(0.02, 0.22)*          | 0.26<br>(0.16, 0.35)**                  | 0.18<br>(0.07, 0.28)**         | 0.21<br>(0.11, 0.31)**            | 0.20<br>(0.11, 0.29)**         | 0.07<br>(-0.03, 0.16)                  | -0.01<br>(-0.11, 0.09)         | 1.43<br>(1.06, 1.93)*   | 1.38<br>(1.05, 1.81)* |
| p-value interaction model <sup>#</sup> |                                    | 0.36                           |                                         | 0.50                           |                                   | 0.50                           |                                        | 0.83                           |                         | 0.76                  |

  

|                     | Body mass index (SDS) <sup>a</sup> |                                | Android-gynoid ratio (SDS) <sup>a</sup> |                                | Fat mass index (SDS) <sup>a</sup> |                                | Fat-free mass index (SDS) <sup>a</sup> |                                | Overweight <sup>b</sup> |                        |
|---------------------|------------------------------------|--------------------------------|-----------------------------------------|--------------------------------|-----------------------------------|--------------------------------|----------------------------------------|--------------------------------|-------------------------|------------------------|
|                     | Boys<br>(n = 2363)                 | Girls<br>(n = 2418)            | Boys<br>(n = 2338)                      | Girls<br>(n = 2394)            | Boys<br>(n = 2330)                | Girls<br>(n = 2391)            | Boys<br>(n = 2330)                     | Girls<br>(n = 2391)            | Boys<br>(n = 2363)      | Girls<br>(n = 2418)    |
| <b>Cannabis</b>     | <b>Difference<br/>(95% CI)</b>     | <b>Difference<br/>(95% CI)</b> | <b>Difference<br/>(95% CI)</b>          | <b>Difference<br/>(95% CI)</b> | <b>Difference<br/>(95% CI)</b>    | <b>Difference<br/>(95% CI)</b> | <b>Difference<br/>(95% CI)</b>         | <b>Difference<br/>(95% CI)</b> | <b>OR (95% CI)</b>      | <b>OR (95% CI)</b>     |
| <b>Maternal use</b> |                                    |                                |                                         |                                |                                   |                                |                                        |                                |                         |                        |
| No                  | Reference                          | Reference                      | Reference                               | Reference                      | Reference                         | Reference                      | Reference                              | Reference                      | Reference               | Reference              |
| Before pregnancy    | -0.08<br>(-0.33, 0.17)             | 0.24<br>(-0.01, 0.48)          | -0.16<br>(-0.39, 0.06)                  | 0.20<br>(-0.05, 0.45)          | -0.12<br>(-0.35, 0.11)            | 0.18<br>(-0.03, 0.39)          | 0.03<br>(-0.20, 0.25)                  | 0.27<br>(0.02, 0.51)*          | 0.76<br>(0.31, 1.86)    | 1.80<br>(0.94, 3.45)   |
| During pregnancy    | 0.12<br>(-0.12, 0.36)              | 0.45<br>(0.18, 0.73)**         | 0.04<br>(-0.18, 0.26)                   | 0.46<br>(0.18, 0.74)**         | 0.01<br>(-0.22, 0.23)             | 0.32<br>(0.08, 0.55)**         | 0.16<br>(-0.06, 0.38)                  | 0.36<br>(0.09, 0.63)**         | 0.67<br>(0.30, 1.47)    | 2.72<br>(1.39, 5.33)** |

|                                        |                       |                        |                        |                        |                      |                        |                       |                       |                      |                      |
|----------------------------------------|-----------------------|------------------------|------------------------|------------------------|----------------------|------------------------|-----------------------|-----------------------|----------------------|----------------------|
| Continued tobacco use                  | 0.11<br>(-0.02, 0.23) | 0.23<br>(0.11, 0.35)** | 0.14<br>(0.03, 0.26)** | 0.28<br>(0.15, 0.41)** | 0.11<br>(0.00, 0.23) | 0.30<br>(0.19, 0.40)** | 0.06<br>(-0.06, 0.17) | 0.09<br>(-0.03, 0.21) | 1.33<br>(0.96, 1.86) | 1.38<br>(1.00, 1.90) |
| p-value interaction model <sup>#</sup> |                       | 0.04                   |                        | 0.01                   |                      | 0.02                   |                       | 0.21                  |                      | 0.03                 |

**Paternal use**

|                                        |                        |                        |                       |                        |                        |                        |                       |                        |                      |                       |
|----------------------------------------|------------------------|------------------------|-----------------------|------------------------|------------------------|------------------------|-----------------------|------------------------|----------------------|-----------------------|
| No                                     | Reference              | Reference              | Reference             | Reference              | Reference              | Reference              | Reference             | Reference              | Reference            | Reference             |
| Cannabis use                           | -0.04<br>(-0.18, 0.11) | 0.27<br>(0.14, 0.41)** | 0.00<br>(-0.13, 0.13) | 0.23<br>(0.09, 0.37)** | -0.04<br>(-0.18, 0.09) | 0.19<br>(0.07, 0.31)** | 0.01<br>(-0.11, 0.14) | 0.31<br>(0.17, 0.45)** | 1.13<br>(0.75, 1.71) | 1.46<br>(1.02, 2.10)* |
| p-value interaction model <sup>#</sup> |                        | < 0.01                 |                       | 0.02                   |                        | 0.01                   |                       | < 0.01                 |                      | 0.12                  |

Note: Confounder model were adjusted for maternal age, maternal education, maternal ethnicity, maternal alcohol use, maternal psychopathology score, pre-pregnancy body mass index (BMI) and child age. \*p-value < 0.05, \*\*p-value < 0.017 (Bonferroni corrected values for multiple testing).

<sup>#</sup> p-values when linear model and model with interaction term were compared.

Abbreviations: Android-gynoid ratio (Android/gynoid fat mass ratio).

<sup>a</sup> Values represent regression coefficients (difference) and 95% confidence interval (95% CI) from linear regression models that reflects the differences in childhood outcomes standard deviation score (SDS) for maternal or paternal tobacco and/or cannabis use during pregnancy, compared to the reference group.

<sup>b</sup> Values are odds ratio (OR) and 95% CI from logistic regression models that reflect the risk of childhood overweight for maternal or paternal tobacco and /or cannabis use during pregnancy, compared to the reference group.

**Table S5.** Associations of maternal and paternal tobacco and cannabis use during pregnancy with childhood blood pressure and metabolic outcomes at age 10 years stratified for child sex

|                                        | Systolic blood pressure (SDS)  |                                | Diastolic blood pressure (SDS) |                                | Total cholesterol (SDS)        |                                | HDL-Cholesterol (SDS)          |                                | Triglyceride (SDS)             |                                |
|----------------------------------------|--------------------------------|--------------------------------|--------------------------------|--------------------------------|--------------------------------|--------------------------------|--------------------------------|--------------------------------|--------------------------------|--------------------------------|
|                                        | Boys<br>(n = 2000)             | Girls<br>(n = 2109)            | Boys<br>(n = 2001)             | Girls<br>(n = 2108)            | Boys<br>(n = 1448)             | Girls<br>(n = 1511)            | Boys<br>(n = 1449)             | Girls<br>(n = 1511)            | Boys<br>(n = 1448)             | Girls<br>(n = 1502)            |
| <b>Tobacco only</b>                    | <b>Difference<br/>(95% CI)</b> |
| <b>Maternal use</b>                    |                                |                                |                                |                                |                                |                                |                                |                                |                                |                                |
| No                                     | Reference                      |
| First trimester only                   | -0.09<br>(-0.25, 0.08)         | -0.04<br>(-0.19, 0.11)         | -0.02<br>(-0.18, 0.15)         | -0.02<br>(-0.17, 0.12)         | 0.06<br>(-0.14, 0.25)          | 0.04<br>(-0.14, 0.21)          | -0.08<br>(-0.27, 0.12)         | 0.09<br>(-0.08, 0.26)          | 0.19<br>(-0.01, 0.39)          | -0.01<br>(-0.18, 0.16)         |
| Continued smoking                      | 0.12<br>(-0.01, 0.25)          | 0.05<br>(-0.08, 0.19)          | 0.05<br>(-0.08, 0.18)          | 0.10<br>(-0.03, 0.23)          | 0.07<br>(-0.09, 0.22)          | 0.04<br>(-0.12, 0.20)          | -0.03<br>(-0.19, 0.13)         | -0.13<br>(-0.28, 0.03)         | 0.25<br>(0.09, 0.41)**         | 0.06<br>(-0.09, 0.21)          |
| < 5 per day                            | 0.08<br>(-0.10, 0.25)          | -0.06<br>(-0.25, 0.14)         | -0.03<br>(-0.20, 0.15)         | 0.03<br>(-0.16, 0.23)          | 0.11<br>(-0.10, 0.31)          | 0.00<br>(-0.23, 0.23)          | -0.12<br>(-0.33, 0.09)         | -0.06<br>(-0.29, 0.16)         | 0.26<br>(0.05, 0.47)**         | -0.07<br>(-0.3, 0.15)          |
| ≥ 5 per day                            | 0.16<br>(0.00, 0.33)           | 0.13<br>(-0.04, 0.29)          | 0.13<br>(-0.04, 0.30)          | 0.14<br>(-0.02, 0.30)          | 0.03<br>(-0.18, 0.23)          | 0.07<br>(-0.13, 0.26)          | 0.07<br>(-0.15, 0.28)          | -0.17<br>(-0.36, 0.02)         | 0.23<br>(0.01, 0.45)*          | 0.15<br>(-0.04, 0.34)          |
| p-value interaction model <sup>#</sup> |                                | 0.53                           |                                | 0.98                           |                                | 0.75                           |                                | 0.29                           |                                | 0.19                           |
| <b>Paternal use</b>                    |                                |                                |                                |                                |                                |                                |                                |                                |                                |                                |
| No                                     | Reference                      |
| Yes                                    | 0.08<br>(-0.01, 0.17)          | -0.01<br>(-0.10, 0.08)         | 0.07<br>(-0.02, 0.16)          | 0.00<br>(-0.09, 0.09)          | 0.09<br>(-0.01, 0.20)          | 0.00<br>(-0.11, 0.11)          | 0.03<br>(-0.08, 0.14)          | -0.07<br>(-0.17, 0.04)         | 0.09<br>(-0.02, 0.20)          | 0.02<br>(-0.09, 0.12)          |
| < 5 per day                            | 0.03<br>(-0.09, 0.16)          | -0.03<br>(-0.16, 0.10)         | 0.07<br>(-0.06, 0.19)          | -0.03<br>(-0.16, 0.10)         | 0.07<br>(-0.08, 0.21)          | -0.03<br>(-0.18, 0.13)         | 0.00<br>(-0.14, 0.15)          | -0.11<br>(-0.26, 0.04)         | 0.14<br>(-0.01, 0.30)          | 0.05<br>(-0.10, 0.19)          |
| ≥ 5 per day                            | 0.12<br>(0.01, 0.22)*          | 0.01<br>(-0.10, 0.11)          | 0.07<br>(-0.04, 0.18)          | 0.02<br>(-0.09, 0.12)          | 0.11<br>(-0.02, 0.23)          | 0.01<br>(-0.11, 0.14)          | 0.05<br>(-0.08, 0.17)          | -0.04<br>(-0.16, 0.08)         | 0.06<br>(-0.07, 0.19)          | 0.00<br>(-0.12, 0.12)          |
| p-value interaction model <sup>#</sup> |                                | 0.10                           |                                | 0.12                           |                                | 0.09                           |                                | 0.16                           |                                | 0.30                           |
| <b>Cannabis</b>                        |                                |                                |                                |                                |                                |                                |                                |                                |                                |                                |
|                                        | Systolic blood pressure (SDS)  |                                | Diastolic blood pressure (SDS) |                                | Total cholesterol (SDS)        |                                | HDL-Cholesterol (SDS)          |                                | Triglyceride (SDS)             |                                |
|                                        | Boys<br>(n = 2273)             | Girls<br>(n = 2346)            | Boys<br>(n = 2274)             | Girls<br>(n = 2345)            | Boys<br>(n = 1644)             | Girls<br>(n = 1680)            | Boys<br>(n = 1645)             | Girls<br>(n = 1681)            | Boys<br>(n = 1643)             | Girls<br>(n = 1672)            |
| <b>Maternal use</b>                    | <b>Difference<br/>(95% CI)</b> |
| No                                     | Reference                      |
| Before pregnancy                       | -0.08<br>(-0.33, 0.17)         | 0.11<br>(-0.15, 0.36)          | 0.03<br>(-0.23, 0.29)          | 0.11<br>(-0.15, 0.36)          | -0.41<br>(-0.70, -0.11)**      | 0.22<br>(-0.08, 0.52)          | 0.12<br>(-0.19, 0.42)          | 0.03<br>(-0.26, 0.32)          | -0.38<br>(-0.68, -0.07)*       | 0.10<br>(-0.19, 0.39)          |
| During pregnancy                       | 0.10<br>(-0.14, 0.35)          | 0.24<br>(-0.05, 0.53)          | 0.05<br>(-0.21, 0.30)          | -0.02<br>(-0.31, 0.26)         | -0.05<br>(-0.35, 0.25)         | 0.04<br>(-0.32, 0.39)          | 0.01<br>(-0.29, 0.32)          | -0.37<br>(-0.71, -0.03)*       | -0.19<br>(-0.50, 0.13)         | 0.19<br>(-0.14, 0.53)          |

|                                        |                                     |                                    |                                     |                                    |                                     |                                    |                                     |                                     |                                       |                                    |
|----------------------------------------|-------------------------------------|------------------------------------|-------------------------------------|------------------------------------|-------------------------------------|------------------------------------|-------------------------------------|-------------------------------------|---------------------------------------|------------------------------------|
| Continued tobacco use                  | 0.13<br>(0.01, 0.26)*               | 0.06<br>(-0.07, 0.19)              | 0.06<br>(-0.07, 0.19)               | 0.10<br>(-0.03, 0.22)              | 0.05<br>(-0.10, 0.20)               | 0.04<br>(-0.11, 0.20)              | -0.05<br>(-0.20, 0.10)              | -0.15<br>(-0.30, 0.00)              | 0.25<br>(0.09, 0.40)**                | 0.08<br>(-0.07, 0.23)              |
| p-value interaction model <sup>#</sup> |                                     | 0.48                               |                                     | 0.92                               |                                     | 0.06                               |                                     | 0.22                                |                                       | 0.02                               |
| <b>Paternal use</b>                    |                                     |                                    |                                     |                                    |                                     |                                    |                                     |                                     |                                       |                                    |
| No Cannabis use                        | Reference<br>-0.04<br>(-0.19, 0.10) | Reference<br>0.11<br>(-0.03, 0.26) | Reference<br>-0.08<br>(-0.23, 0.07) | Reference<br>0.11<br>(-0.03, 0.25) | Reference<br>-0.12<br>(-0.30, 0.05) | Reference<br>0.15<br>(-0.02, 0.32) | Reference<br>0.23<br>(0.05, 0.40)** | Reference<br>-0.06<br>(-0.23, 0.10) | Reference<br>-0.20<br>(-0.38, -0.02)* | Reference<br>0.10<br>(-0.06, 0.27) |
| p-value interaction model <sup>#</sup> |                                     | 0.19                               |                                     | 0.15                               |                                     | 0.11                               |                                     | < 0.01                              |                                       | < 0.01                             |

Note: Confounder model were adjusted for maternal age, maternal education, maternal ethnicity, maternal alcohol use, maternal psychopathology score, pre-pregnancy body mass index (BMI), and child age. \*p-value < 0.05, \*\*p-value < 0.017 (Bonferroni corrected values for multiple testing).

<sup>#</sup> p-values when linear model and model with interaction term were compared.

Values are regression coefficients (difference), 95% confidence interval (95% CI) from linear regression models that reflects the differences in childhood outcomes standard deviation score (SDS) for maternal or paternal tobacco and/or cannabis use during pregnancy, compared to the reference group.

Abbreviations: HDL-cholesterol: high-density lipoprotein cholesterol.

**Table S6.** Associations of maternal and paternal tobacco and cannabis use during pregnancy with childhood cardio-metabolic risk factors at age 10 years stratified for child sex

|                                        | Glucose (SDS) <sup>a</sup> |                            | Insulin (SDS) <sup>a</sup> |                            | Cardio-metabolic clustering <sup>b</sup> |                        |
|----------------------------------------|----------------------------|----------------------------|----------------------------|----------------------------|------------------------------------------|------------------------|
|                                        | Boys (n = 1449)            | Girls (n = 1509)           | Boys (n = 1447)            | Girls (n = 1507)           | Boys (n = 1397)                          | Girls (n = 1465)       |
| <b>Tobacco only</b>                    | <b>Difference (95% CI)</b> | <b>Difference (95% CI)</b> | <b>Difference (95% CI)</b> | <b>Difference (95% CI)</b> | <b>OR (95% CI)</b>                       | <b>OR (95% CI)</b>     |
| <b>Maternal use</b>                    |                            |                            |                            |                            |                                          |                        |
| No                                     | Reference                  | Reference                  | Reference                  | Reference                  | Reference                                | Reference              |
| First trimester only                   | -0.05<br>(-0.25, 0.15)     | 0.05<br>(-0.12, 0.23)      | -0.10<br>(-0.29, 0.10)     | -0.05<br>(-0.23, 0.12)     | 0.97<br>(0.43, 2.22)                     | 0.81<br>(0.48, 1.38)   |
| Continued smoking                      | 0.02<br>(-0.13, 0.18)      | 0.01<br>(-0.15, 0.17)      | 0.00<br>(-0.16, 0.15)      | 0.07<br>(-0.08, 0.23)      | 1.31<br>(0.80, 2.12)                     | 1.33<br>(0.89, 1.99)   |
| < 5 per day                            | 0.04<br>(-0.17, 0.24)      | -0.03<br>(-0.26, 0.20)     | 0.00<br>(-0.20, 0.21)      | -0.05<br>(-0.28, 0.19)     | 1.21<br>(0.63, 2.31)                     | 0.81<br>(0.41, 1.60)   |
| ≥ 5 per day                            | 0.01<br>(-0.20, 0.22)      | 0.04<br>(-0.16, 0.23)      | -0.01<br>(-0.22, 0.20)     | 0.15<br>(-0.04, 0.35)      | 1.41<br>(0.75, 2.64)                     | 1.74<br>(1.08, 2.80)*  |
| p-value interaction model <sup>#</sup> |                            | 0.63                       |                            | 0.75                       |                                          | 0.96                   |
| <b>Paternal use</b>                    |                            |                            |                            |                            |                                          |                        |
| No                                     | Reference                  | Reference                  | Reference                  | Reference                  | Reference                                | Reference              |
| Yes                                    | -0.03<br>(-0.14, 0.08)     | 0.03<br>(-0.08, 0.13)      | -0.08<br>(-0.19, 0.03)     | 0.03<br>(-0.07, 0.14)      | 1.57<br>(1.09, 2.24)**                   | 0.96<br>(0.71, 1.29)   |
| < 5 per day                            | -0.10<br>(-0.25, 0.05)     | -0.17<br>(-0.32, -0.02)*   | -0.02<br>(-0.17, 0.13)     | -0.06<br>(-0.21, 0.1)      | 1.67<br>(1.01, 2.76)*                    | 0.82<br>(0.51, 1.30)   |
| ≥ 5 per day                            | 0.02<br>(-0.11, 0.15)      | 0.14<br>(0.02, 0.27)*      | -0.12<br>(-0.24, 0.01)     | 0.09<br>(-0.04, 0.21)      | 1.50<br>(1.00, 2.26)*                    | 1.03<br>(0.73, 1.46)   |
| p-value interaction model <sup>#</sup> |                            | 0.68                       |                            | 0.12                       |                                          | 0.03                   |
| <b>Cannabis</b>                        |                            |                            |                            |                            |                                          |                        |
|                                        | Glucose (SDS) <sup>a</sup> |                            | Insulin (SDS) <sup>a</sup> |                            | Cardio-metabolic clustering <sup>b</sup> |                        |
|                                        | Boys (n = 1645)            | Girls (n = 1679)           | Boys (n = 1643)            | Girls (n = 1677)           | Boys (n = 1582)                          | Girls (n = 1630)       |
| <b>Maternal use</b>                    | <b>Difference (95% CI)</b> | <b>Difference (95% CI)</b> | <b>Difference (95% CI)</b> | <b>Difference (95% CI)</b> | <b>OR (95% CI)</b>                       | <b>OR (95% CI)</b>     |
| No                                     | Reference                  | Reference                  | Reference                  | Reference                  | Reference                                | Reference              |
| Cannabis before                        | -0.17<br>(-0.47, 0.13)     | 0.08<br>(-0.22, 0.38)      | -0.02<br>(-0.32, 0.28)     | 0.20<br>(-0.09, 0.50)      | 0.00<br>(0.00, Inf)                      | 0.90<br>(0.36, 2.20)   |
| Cannabis during                        | 0.09<br>(-0.22, 0.39)      | -0.08<br>(-0.43, 0.27)     | -0.23<br>(-0.53, 0.07)     | 0.27<br>(-0.08, 0.61)      | 1.06<br>(0.39, 2.89)                     | 2.74<br>(1.21, 6.22)** |
| Continued tobacco                      | 0.00<br>(-0.15, 0.15)      | -0.01<br>(-0.17, 0.14)     | -0.01<br>(-0.16, 0.15)     | 0.07<br>(-0.08, 0.22)      | 1.27<br>(0.79, 2.03)                     | 1.40<br>(0.94, 2.07)   |
| p-value interaction model <sup>#</sup> |                            | 0.52                       |                            | 0.16                       |                                          | 0.06                   |
| <b>Paternal use</b>                    |                            |                            |                            |                            |                                          |                        |
| No                                     | Reference                  | Reference                  | Reference                  | Reference                  | Reference                                | Reference              |
| Cannabis use                           | -0.14<br>(-0.32, 0.04)     | -0.01<br>(-0.18, 0.16)     | -0.08<br>(-0.26, 0.10)     | 0.22<br>(0.05, 0.39)**     | 0.49<br>(0.23, 1.01)                     | 1.30<br>(0.84, 2.02)   |
| p-value interaction model <sup>#</sup> |                            | 0.45                       |                            | 0.01                       |                                          | < 0.01                 |

Note: Confounder model were adjusted for maternal age, education, ethnicity, alcohol use, psychopathology score, pre-pregnancy body mass index (BMI), and child age. \*p-value < 0.05, \*\*p-value < 0.017 (Bonferroni corrected values for multiple testing).

<sup>#</sup> p-values when linear model and model with interaction term were compared.

<sup>a</sup> Values represent regression coefficients (difference) and 95% confidence interval (95% CI) from linear regression models that reflects the differences in childhood outcomes standard deviation score (SDS) for maternal or paternal tobacco and/or cannabis use during pregnancy, compared to the reference group.

<sup>b</sup> Values are odds ratio (OR) and 95% CI from logistic regression models that reflect the risk of childhood cardio-metabolic clustering risk for maternal or paternal tobacco and/or cannabis use during pregnancy compared with the reference group.

**Table S7.** Associations of maternal and paternal tobacco and cannabis use with childhood body fat outcomes only for children at age 10 years of Dutch mothers

|                                        | <b>Body mass index (SDS)<sup>a</sup><br/>(n = 2431)</b> | <b>Android-gynoid ratio (SDS)<sup>a</sup><br/>(n = 2404)</b> | <b>Fat mass index (SDS)<sup>a</sup><br/>(n = 2403)</b> | <b>Fat-free mass index (SDS)<sup>a</sup><br/>(n = 2403)</b> | <b>Overweight<sup>b</sup><br/>(n = 2431)</b> |
|----------------------------------------|---------------------------------------------------------|--------------------------------------------------------------|--------------------------------------------------------|-------------------------------------------------------------|----------------------------------------------|
| <b>Tobacco only</b>                    | <b>Difference (95% CI)</b>                              | <b>Difference (95% CI)</b>                                   | <b>Difference (95% CI)</b>                             | <b>Difference (95% CI)</b>                                  | <b>OR (95% CI)</b>                           |
| <b>Maternal use</b>                    |                                                         |                                                              |                                                        |                                                             |                                              |
| No                                     | Reference                                               | Reference                                                    | Reference                                              | Reference                                                   | Reference                                    |
| First trimester only                   | -0.02 (-0.14, 0.11)                                     | 0.05 (-0.08, 0.17)                                           | -0.05 (-0.16, 0.06)                                    | 0.01 (-0.11, 0.13)                                          | 1.29 (0.81, 2.06)                            |
| Continued smoking                      | 0.24 (0.12, 0.35)**                                     | 0.24 (0.13, 0.35)**                                          | 0.27 (0.17, 0.37)**                                    | 0.11 (0.00, 0.21)*                                          | 1.63 (1.14, 2.33)**                          |
| < 5 per day                            | 0.13 (-0.04, 0.29)                                      | 0.09 (-0.07, 0.25)                                           | 0.14 (-0.01, 0.29)                                     | 0.06 (-0.09, 0.22)                                          | 1.23 (0.68, 2.21)                            |
| ≥ 5 per day                            | 0.31 (0.17, 0.45)**                                     | 0.34 (0.20, 0.48)**                                          | 0.36 (0.23, 0.48)**                                    | 0.14 (0.01, 0.26)*                                          | 1.89 (1.24, 2.89)**                          |
| p-value interaction model <sup>#</sup> | 0.42                                                    | 0.19                                                         | 0.39                                                   | 0.65                                                        | 0.07                                         |
| <b>Paternal use</b>                    |                                                         |                                                              |                                                        |                                                             |                                              |
| No                                     | Reference                                               | Reference                                                    | Reference                                              | Reference                                                   | Reference                                    |
| Yes                                    | 0.09 (0.01, 0.16)*                                      | 0.11 (0.04, 0.18)**                                          | 0.09 (0.03, 0.16)**                                    | 0.03 (-0.04, 0.1)                                           | 1.16 (0.88, 1.53)                            |
| < 5 per day                            | 0.05 (-0.05, 0.16)                                      | 0.00 (-0.10, 0.10)                                           | -0.01 (-0.10, 0.09)                                    | 0.08 (-0.01, 0.18)                                          | 0.98 (0.64, 1.49)                            |
| ≥ 5 per day                            | 0.12 (0.02, 0.21)**                                     | 0.19 (0.10, 0.28)**                                          | 0.17 (0.09, 0.25)**                                    | -0.01 (-0.10, 0.07)                                         | 1.26 (0.92, 1.73)                            |
| p-value interaction model <sup>#</sup> | 0.46                                                    | 0.02                                                         | 0.10                                                   | 0.95                                                        | 0.50                                         |
| <hr/>                                  |                                                         |                                                              |                                                        |                                                             |                                              |
|                                        | <b>Body mass index (SDS)<sup>a</sup><br/>(n = 2726)</b> | <b>Android-gynoid ratio (SDS)<sup>a</sup><br/>(n = 2697)</b> | <b>Fat mass index (SDS)<sup>a</sup><br/>(n = 2694)</b> | <b>Fat-free mass index (SDS)<sup>a</sup><br/>(n = 2694)</b> | <b>Overweight<sup>b</sup><br/>(n = 2726)</b> |
| <b>Cannabis</b>                        | <b>Difference (95% CI)</b>                              | <b>Difference (95% CI)</b>                                   | <b>Difference (95% CI)</b>                             | <b>Difference (95% CI)</b>                                  | <b>OR (95% CI)</b>                           |
| <b>Maternal use</b>                    |                                                         |                                                              |                                                        |                                                             |                                              |
| No                                     | Reference                                               | Reference                                                    | Reference                                              | Reference                                                   | Reference                                    |
| Cannabis before                        | 0.07 (-0.13, 0.27)                                      | -0.07 (-0.27, 0.12)                                          | -0.01 (-0.18, 0.17)                                    | 0.22 (0.03, 0.41)*                                          | 1.56 (0.79, 3.10)                            |
| Cannabis during                        | 0.24 (0.03, 0.46)*                                      | 0.31 (0.10, 0.52)**                                          | 0.19 (-0.01, 0.38)                                     | 0.14 (-0.07, 0.34)                                          | 1.00 (0.46, 2.19)                            |
| Continued tobacco                      | 0.24 (0.12, 0.35)**                                     | 0.23 (0.12, 0.34)**                                          | 0.27 (0.17, 0.37)**                                    | 0.1 (-0.01, 0.20)                                           | 1.56 (1.10, 2.21)**                          |
| p-value interaction model <sup>#</sup> | 0.69                                                    | 0.41                                                         | 0.40                                                   | 0.35                                                        | 0.12                                         |
| <b>Paternal use</b>                    |                                                         |                                                              |                                                        |                                                             |                                              |
| No                                     | Reference                                               | Reference                                                    | Reference                                              | Reference                                                   | Reference                                    |
| Cannabis use                           | 0.16 (0.04, 0.28)**                                     | 0.25 (0.13, 0.37)**                                          | 0.17 (0.06, 0.27)**                                    | 0.13 (0.02, 0.24)*                                          | 1.69 (1.15, 2.48)**                          |
| p-value interaction model <sup>#</sup> | 0.42                                                    | 0.03                                                         | 0.14                                                   | 0.01                                                        | 0.20                                         |

Note: Confounder models were adjusted for maternal age, maternal education, maternal alcohol use, maternal psychopathology score, pre-pregnancy body mass index (BMI), child sex, and child age. \*p-value < 0.05, \*\*p-value < 0.017 (Bonferroni corrected values for multiple testing).

Abbreviations: Android-gynoid ratio (Android/gynoid fat mass ratio). # p-values when linear model and model with interaction term were compared.

<sup>a</sup> Values represent regression coefficients (difference) and 95% confidence interval (95% CI) from linear regression models that reflects the differences in childhood outcomes standard deviation score (SDS) for maternal or paternal tobacco and/or cannabis use during pregnancy, compared to the reference group.

<sup>b</sup> Values are odds ratio (OR) and 95% CI from logistic regression models that reflect the risk of childhood overweight for maternal or paternal tobacco and/or cannabis use during pregnancy, compared to the reference group.

**Table S8.** Associations of maternal and paternal tobacco and cannabis use with childhood cardio-metabolic risk factors only for children at age 10 years of Dutch mothers

|                                        | Systolic blood pressure (SDS) <sup>a</sup><br>(n = 2344) | Diastolic blood pressure (SDS) <sup>a</sup><br>(n = 2344) | Total Cholesterol (SDS) <sup>a</sup><br>(n = 1676) | HDL-Cholesterol (SDS) <sup>a</sup><br>(n = 1677) | Triglyceride (SDS) <sup>a</sup><br>(n = 1673) | Glucose (SDS) <sup>a</sup><br>(n = 1676) | Insulin (SDS) <sup>a</sup><br>(n = 1676) | Cardio-metabolic clustering <sup>b</sup><br>(n = 1622) |
|----------------------------------------|----------------------------------------------------------|-----------------------------------------------------------|----------------------------------------------------|--------------------------------------------------|-----------------------------------------------|------------------------------------------|------------------------------------------|--------------------------------------------------------|
| <b>Tobacco only</b>                    | Difference (95% CI)                                      | Difference (95% CI)                                       | Difference (95% CI)                                | Difference (95% CI)                              | Difference (95% CI)                           | Difference (95% CI)                      | Difference (95% CI)                      | OR (95% CI)                                            |
| <b>Maternal use</b>                    |                                                          |                                                           |                                                    |                                                  |                                               |                                          |                                          |                                                        |
| No                                     | Reference                                                | Reference                                                 | Reference                                          | Reference                                        | Reference                                     | Reference                                | Reference                                | Reference                                              |
| First trimester only                   | -0.07 (-0.21, 0.07)                                      | 0.01 (-0.13, 0.15)                                        | -0.02 (-0.18, 0.15)                                | 0.07 (-0.10, 0.23)                               | -0.04 (-0.20, 0.13)                           | 0.04 (-0.13, 0.22)                       | -0.09 (-0.25, 0.07)                      | 0.86 (0.45, 1.65)                                      |
| Continued smoking                      | 0.05 (-0.07, 0.18)                                       | 0.01 (-0.12, 0.14)                                        | 0.05 (-0.1, 0.19)                                  | 0.02 (-0.13, 0.16)                               | -0.03 (-0.18, 0.12)                           | 0.04 (-0.11, 0.20)                       | 0.03 (-0.12, 0.17)                       | 1.12 (0.68, 1.85)                                      |
| < 5 per day                            | -0.07 (-0.26, 0.12)                                      | -0.12 (-0.31, 0.07)                                       | -0.01 (-0.22, 0.2)                                 | -0.08 (-0.29, 0.13)                              | -0.03 (-0.25, 0.18)                           | 0.06 (-0.17, 0.28)                       | 0 (-0.21, 0.21)                          | 0.95 (0.43, 2.10)                                      |
| ≥ 5 per day                            | 0.13 (-0.02, 0.29)                                       | 0.10 (-0.06, 0.25)                                        | 0.09 (-0.09, 0.28)                                 | 0.09 (-0.10, 0.27)                               | -0.03 (-0.22, 0.16)                           | 0.03 (-0.16, 0.23)                       | 0.05 (-0.14, 0.23)                       | 1.23 (0.67, 2.26)                                      |
| p-value interaction model <sup>#</sup> | 0.57                                                     | 0.08                                                      | 0.56                                               | 0.25                                             | < 0.01                                        | 0.94                                     | 0.66                                     | 0.54                                                   |
| <b>Paternal use</b>                    |                                                          |                                                           |                                                    |                                                  |                                               |                                          |                                          |                                                        |
| No                                     | Reference                                                | Reference                                                 | Reference                                          | Reference                                        | Reference                                     | Reference                                | Reference                                | Reference                                              |
| Yes                                    | -0.03 (-0.11, 0.06)                                      | 0.00 (-0.08, 0.09)                                        | 0.12 (0.02, 0.21)*                                 | 0.03 (-0.07, 0.12)                               | 0.03 (-0.07, 0.13)                            | -0.04 (-0.15, 0.06)                      | -0.04 (-0.14, 0.06)                      | 0.98 (0.68, 1.41)                                      |
| < 5 per day                            | -0.03 (-0.15, 0.08)                                      | 0.00 (-0.12, 0.11)                                        | 0.06 (-0.07, 0.19)                                 | -0.03 (-0.17, 0.10)                              | 0.07 (-0.07, 0.20)                            | -0.18 (-0.33, -0.04)**                   | -0.06 (-0.19, 0.08)                      | 0.82 (0.47, 1.43)                                      |
| ≥ 5 per day                            | -0.02 (-0.12, 0.08)                                      | 0.00 (-0.10, 0.10)                                        | 0.15 (0.04, 0.27)**                                | 0.07 (-0.05, 0.19)                               | 0.01 (-0.12, 0.13)                            | 0.06 (-0.07, 0.18)                       | -0.03 (-0.15, 0.09)                      | 1.07 (0.71, 1.63)                                      |
| p-value interaction model <sup>#</sup> | 0.07                                                     | 0.45                                                      | 0.12                                               | 0.07                                             | 0.10                                          | 0.05                                     | 0.32                                     | 0.16                                                   |
| <b>Cannabis</b>                        |                                                          |                                                           |                                                    |                                                  |                                               |                                          |                                          |                                                        |
|                                        | Systolic blood pressure (SDS) <sup>a</sup><br>(n = 2633) | Diastolic blood pressure (SDS) <sup>a</sup><br>(n = 2633) | Total Cholesterol (SDS) <sup>a</sup><br>(n = 1874) | HDL-Cholesterol (SDS) <sup>a</sup><br>(n = 1875) | Triglyceride (SDS) <sup>a</sup><br>(n = 1871) | Glucose (SDS) <sup>a</sup><br>(n = 1874) | Insulin (SDS) <sup>a</sup><br>(n = 1874) | Cardio-metabolic clustering <sup>b</sup><br>(n = 1812) |
| <b>Cannabis</b>                        | Difference (95% CI)                                      | Difference (95% CI)                                       | Difference (95% CI)                                | Difference (95% CI)                              | Difference (95% CI)                           | Difference (95% CI)                      | Difference (95% CI)                      | OR (95% CI)                                            |
| <b>Maternal use</b>                    |                                                          |                                                           |                                                    |                                                  |                                               |                                          |                                          |                                                        |
| No                                     | Reference                                                | Reference                                                 | Reference                                          | Reference                                        | Reference                                     | Reference                                | Reference                                | Reference                                              |
| Cannabis before                        | 0.00 (-0.22, 0.22)                                       | 0.01 (-0.21, 0.24)                                        | 0.12 (-0.13, 0.38)                                 | 0.24 (-0.01, 0.49)                               | -0.18 (-0.44, 0.08)                           | 0.05 (-0.22, 0.31)                       | 0.17 (-0.08, 0.41)                       | 0.56 (0.17, 1.85)                                      |
| Cannabis during                        | 0.18 (-0.06, 0.42)                                       | 0.15 (-0.10, 0.39)                                        | -0.14 (-0.44, 0.15)                                | -0.17 (-0.46, 0.13)                              | -0.12 (-0.42, 0.19)                           | 0.04 (-0.27, 0.36)                       | 0.02 (-0.27, 0.32)                       | 1.44 (0.55, 3.74)                                      |
| Continued tobacco                      | 0.06 (-0.06, 0.19)                                       | 0.00 (-0.12, 0.12)                                        | 0.04 (-0.10, 0.19)                                 | -0.02 (-0.16, 0.13)                              | 0.00 (-0.15, 0.15)                            | 0.02 (-0.14, 0.17)                       | 0.03 (-0.11, 0.17)                       | 1.15 (0.71, 1.89)                                      |
| p-value interaction model <sup>#</sup> | 0.81                                                     | 0.08                                                      | 0.14                                               | 0.14                                             | 0.03                                          | 0.64                                     | 0.90                                     | 0.36                                                   |
| <b>Paternal use</b>                    |                                                          |                                                           |                                                    |                                                  |                                               |                                          |                                          |                                                        |
| No                                     | Reference                                                | Reference                                                 | Reference                                          | Reference                                        | Reference                                     | Reference                                | Reference                                | Reference                                              |
| Cannabis use                           | 0.10 (-0.04, 0.23)                                       | 0.04 (-0.09, 0.17)                                        | 0.01 (-0.15, 0.16)                                 | -0.01 (-0.17, 0.15)                              | 0.03 (-0.13, 0.19)                            | 0.01 (-0.16, 0.18)                       | 0.18 (0.02, 0.34)*                       | 1.17 (0.69, 1.98)                                      |
| p-value interaction model <sup>#</sup> | 0.24                                                     | 0.84                                                      | 0.93                                               | 0.27                                             | 0.49                                          | 0.23                                     | 0.32                                     | 0.16                                                   |

Note: Confounder models were adjusted for maternal age, education, alcohol use, psychopathology score, pre-pregnancy body mass index (BMI), child sex, and child age.

Abbreviations: HDL-cholesterol: high-density lipoprotein cholesterol. \*p-value < 0.05, \*\*p-value < 0.017 (Bonferroni corrected values for multiple testing).

<sup>a</sup> Values represent regression coefficients (difference) and 95% confidence interval (95% CI) from linear regression models that reflects the differences in childhood outcomes standard deviation score (SDS) for maternal or paternal tobacco and/or cannabis use during pregnancy, compared to the reference group.

<sup>b</sup> Values are odds ratio (OR) and 95% CI from logistic regression models that reflect the risk of childhood cardio-metabolic clustering risk for maternal or paternal tobacco and/or cannabis use during pregnancy, compared to the reference group. <sup>#</sup> p-values when linear model and model with interaction term were compared.

## **Methods S1.** Calculation of the continuous composite cardio-metabolic risk z-score

To establish a continuous composite cardio-metabolic risk score, we calculated the standardized residuals (z-scores) for individual risk factors by regression on selected demographic variables such as child sex and child age.<sup>1</sup> The individual risk factors were body mass index (BMI), mean arterial pressure (MAP) ( $[\text{systolic blood pressure} + 2 \times (\text{diastolic blood pressure})] / 3$ ), log-natural transformed homeostasis assessment model of insulin resistance (HOMA) ( $[\text{Glucose (mmol/L)} \times \text{Insuline (mU/L)}] / 22.5$ ), log-natural transformed triglycerides, and HDL-cholesterol.<sup>1</sup> Since the standardized HDL-cholesterol is inversely related to metabolic risk it is multiplied by -1. Then, the standardized residuals (z-scores) for the individual risk factors were summed to create the metabolic syndrome z-score. Since waist circumference was not available, body mass index was used. A higher score is interpreted as a indicative of a less favorable metabolic syndrome profile.<sup>1</sup>

## **Reference**

1. Eisenmann JC. On the use of a continuous metabolic syndrome score in pediatric research. *Cardiovascular diabetology*. 2008;7:17-17. doi:10.1186/1475-2840-7-17



**Table S9.** Associations of maternal and paternal tobacco and cannabis use with childhood continuous composite cardio-metabolic z-score at age 10 years

|                      | <b>Cardio-metabolic z-score</b> |
|----------------------|---------------------------------|
| <b>Tobacco only</b>  | <b>Difference (95% CI)</b>      |
| <b>Maternal use</b>  |                                 |
| No                   | Reference                       |
| First trimester only | -0.08 (-0.47, 0.31)             |
| Continued smoking    | 0.48 (0.16, 0.80)**             |
| < 5 per day          | 0.29 (-0.16, 0.75)              |
| ≥ 5 per day          | 0.64 (0.22, 1.05)**             |
| <b>Paternal use</b>  |                                 |
| No                   | Reference                       |
| Yes                  | 0.20 (-0.02, 0.42)              |
| < 5 per day          | 0.13 (-0.18, 0.44)              |
| ≥ 5 per day          | 0.24 (-0.02, 0.51)              |
| <b>Cannabis</b>      |                                 |
| <b>Maternal use</b>  |                                 |
| No                   | Reference                       |
| Cannabis before      | 0.01 (-0.61, 0.63)              |
| Cannabis during      | 0.27 (-0.41, 0.95)              |
| Continued tobacco    | 0.50 (0.18, 0.82)**             |
| <b>Paternal use</b>  |                                 |
| No                   | Reference                       |
| Cannabis use         | 0.04 (-0.32, 0.40)              |

Note: Confounder models were adjusted for maternal age, ethnicity, education, alcohol use, psychopathology score, pre-pregnancy body mass index (BMI). \*p-value < 0.05, \*\*p-value < 0.017 (Bonferroni corrected values for multiple testing). Values represent regression coefficients (difference) and 95% confidence interval (95% CI) from linear regression models that reflects the differences in childhood continuous cardio-metabolic z-score for maternal or paternal tobacco and/or cannabis use during pregnancy, compared to the reference group.
